# Supplementary material for: The Regulation of Plasma Interleukin-6 Levels Is Modified by Hippocampal Sclerosis and Its Lateralization in Drug-Resistant Temporal Lobe Epilepsy
Source: Hindawi journal article supplement (doi:10.1155/2023/3030625), 2023-04-14
Supplement: f1 [file 3030625.f1.pdf]

Supplementary Fig. 1.

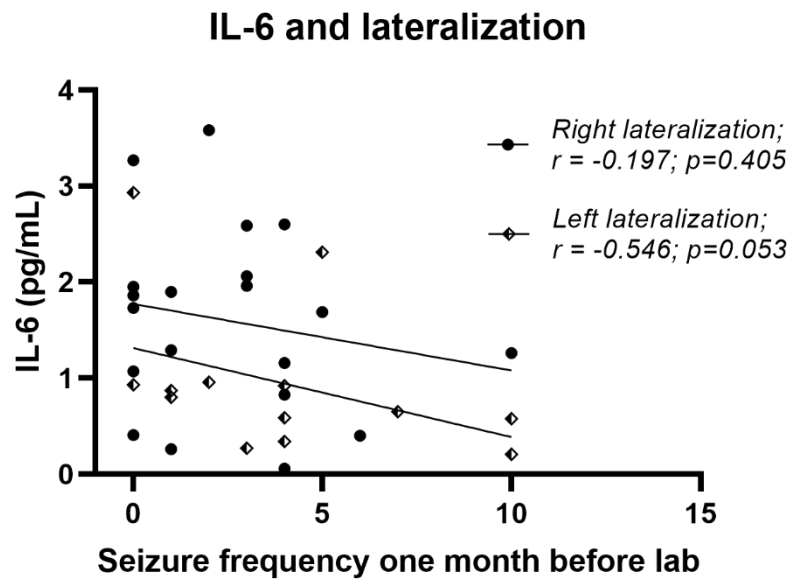

Supplementary Fig. 1. Spearman's correlation analysis between IL-6 and seizure frequency one month before the lab in TLE+HS patients based on lateralization.
